# Supplementary material for: TasselLFANet: a novel lightweight multi-branch feature aggregation neural network for high-throughput image-based maize tassels detection and counting
Source: Frontiers journal article supplement (doi:10.3389/fpls.2023.1158940), 2023-04-14
Supplement: Presentation_1.pdf [file Presentation_1.pdf]

## *Supplementary Material*

# **TasselLFANet: A Novel Lightweight Multi-Branch Feature Aggregation Neural Network for High-throughput Image-based Maize Tassels Detection and Counting**

Zhenghong Yu\*, Jianxiong Ye, Cuina Li, Huabing Zhou, Xun Li

\* **Correspondence:** Dr. Zhenghong Yu, Email: hongr1983@gmail.com

## **1 Supplementary Video**

We provide a demonstration video of the comparative experiment. See website address:

<https://youtu.be/NPVdX-MX3es>

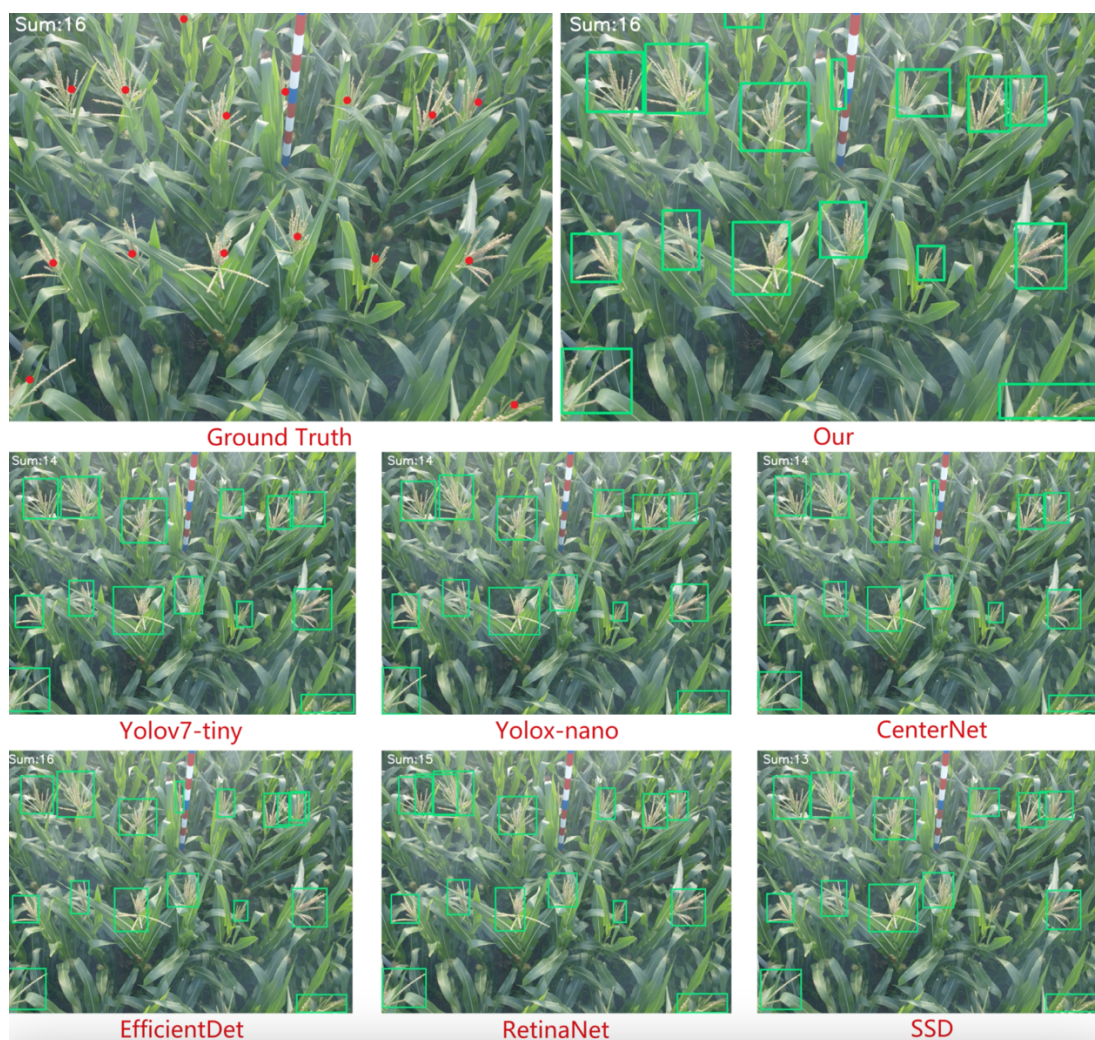

## **2 Code and Dataset**

Please refer to the website for the code of our model:

<https://github.com/Ye-Sk/TasselLFANet>

The public dataset MrMT we provide can be obtained from the website:

<https://github.com/Ye-Sk/MrMT>
